# Supplementary material for: Sulfonylureas suppress the stimulatory action of Mg-nucleotides on Kir6.2/SUR1 but not Kir6.2/SUR2A KATP channels: A mechanistic study
Source: PubMed Central journal article supplement — J Gen Physiol. 2014 Nov;144(5):469–86. doi: 10.1085/jgp.201411222 (PMC4210431; doi:10.1085/jgp.201411222), 2014-11
Supplement: supp_jgp.201411222_JGP_201411222_sm.pdf [file supp_jgp.201411222_JGP_201411222_sm.pdf]

Proks et al., <http://www.jgp.org/cgi/content/full/jgp.201411222/DC1>

Simulations of the effect of  $P_O$  on the  $EC_{50}$  for Mg-nucleotide activation

Is the shift in  $EC_{50}$  for Mg-nucleotide activation in the presence of gliclazide produced by the reduction in  $P_O$  produced by the drug? In principle, changes in gating could account for the shift in the  $EC_{50}$  for MgADP activation produced by gliclazide (Colquhoun, 1998). To address whether this is actually the case, we must first consider the complication that Mg-nucleotide activation of Kir6.2-G334D/SUR1 channels consists of an increase in both  $N$  and  $P_O$  (Proks et al., 2010). Given that inactive channels have a  $P_O$  close to zero and that the mean  $P_O$  of active channels is  $\sim 0.4$ , different  $EC_{50}$  values might be expected for the increase in  $N$  and  $P_O$  in the absence of gliclazide (Colquhoun, 1998). This would be expected to give rise to a biphasic MgADP concentration-activation curve or a slope factor of  $<1$ , depending on the relative magnitudes of the effect of MgADP on  $N$  and  $P_O$ . However, this was not observed (Proks et al., 2010). Furthermore, because the decline in  $P_O$  after patch excision stabilizes much earlier than that in  $N$ , any difference in the  $EC_{50}$  for the MgADP-induced increase in  $N$  and  $P_O$  would be expected to result in the development of a biphasic concentration-activation relation (or change in  $EC_{50}$  and/or in slope) after patch excision. This was also not observed (Proks et al., 2010). Thus, it appears that the  $EC_{50}$  for MgADP activation of  $N$  and  $P_O$  are similar or that the effect of one of them dominates. In most patches the effect on  $N$  and  $P_O$  was of comparable size (Proks et al., 2010), implying the  $EC_{50}$  must also be similar.

Noise analysis indicated that gliclazide reduced the ability of 1 mM MgADP to enhance the  $P_O$  of Kir6.2-G334D/SUR1 channels by  $\sim 20\%$  and decreased  $N$  by  $\sim 60\%$ , indicating that both activatory processes are still present in the presence of the drug. The MgADP concentration-activation relationship was monophasic, with a slope factor ( $h$ ) similar to that in the absence of the drug. Thus, the drug is unlikely to differentially influence the  $EC_{50}$  for the activatory mechanisms governing  $P_O$  and  $N$ .

Collectively, these observations indicate that the increase in  $P_O$  and  $N$  produced by MgADP do not have markedly different  $EC_{50}$  and are not differentially affected by gliclazide. Thus, we can now consider whether gliclazide affects the gating equilibrium by focusing on the effect of the drug on the  $P_O$  of active (functional) channels. There was no obvious relationship between the mean  $P_O$  of Kir6.2-G334D/SUR1 channels measured before nucleotide application (range 0.2–0.6), and the extent of activation by an MgADP concentration close to the  $EC_{50}$  (Fig. S6 A). High-affinity gliclazide inhibition reduces  $P_O$  by a maximum of  $\sim 60\%$  (i.e., from 0.6 to 0.24 or from 0.2 to 0.08); because  $P_O$  over the range 0.2–0.6 has little effect on  $EC_{50}$ , it is unlikely that gliclazide substantially influences  $EC_{50}$  via changes in  $P_O$  of active channels in the membrane. In support of this idea, a concerted model of  $K_{ATP}$  channel gating (Drain et al., 2004; Babenko, 2008; Craig et al., 2008) also predicts only small changes in  $EC_{50}$  over this range of  $P_O$  (Fig. S6, B and C).

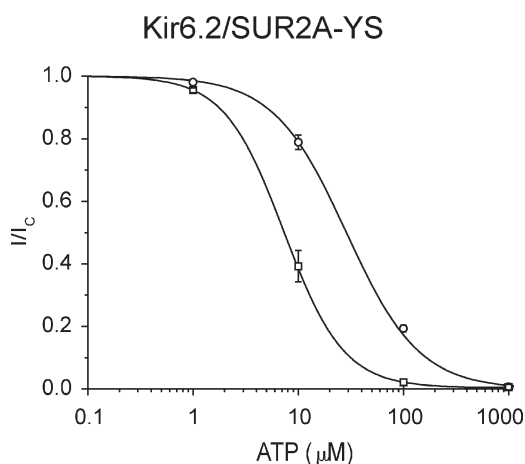

**Figure S1.** Concentration-response relationships for ATP inhibition of Kir6.2/SUR2A-YS channels in the absence (open squares;  $n = 6$ ) and presence (open circles;  $n = 6$ ) of  $Mg^{2+}$ . Current in the presence of ATP ( $I$ ) is expressed as a fraction of that in the absence of ATP ( $I_C$ ). The lines are the best fit of Eq. 1 to the mean data: open squares,  $IC_{50} = 7 \mu M$  (close to the  $10 \mu M$  reported for Kir6.2/SUR2A by Tammamaro et al. [2006]),  $h = 1.5$  ( $0 Mg^{2+}$ ); open circles,  $IC_{50} = 30 \mu M$  (close to the  $29 \mu M$  reported for Kir6.2/SUR2A by Reimann et al. [2000]),  $h = 1.3$  ( $2 mM Mg^{2+}$ ). Mean  $\pm$  SEM.

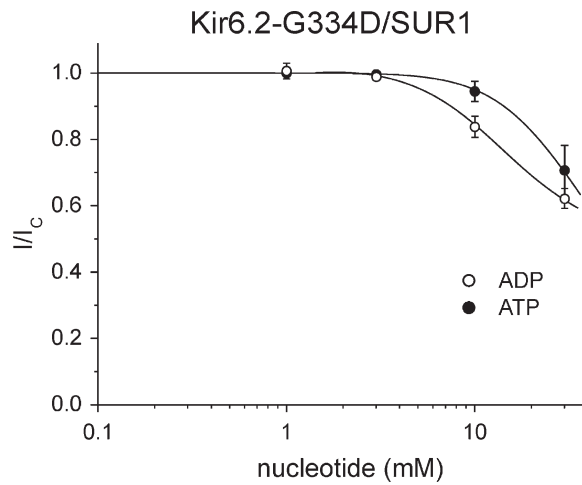

**Figure S2.** Concentration-response relationship for inhibition of Kir6.2-G334D/SUR1 channels by ATP ( $n = 6$ ) and ADP ( $n = 6$ ) in the absence of  $Mg^{2+}$ . Current in the presence of nucleotide ( $I$ ) is expressed as a fraction of that in the absence of nucleotide ( $I_C$ ). The lines are drawn by hand. Mean  $\pm$  SEM.

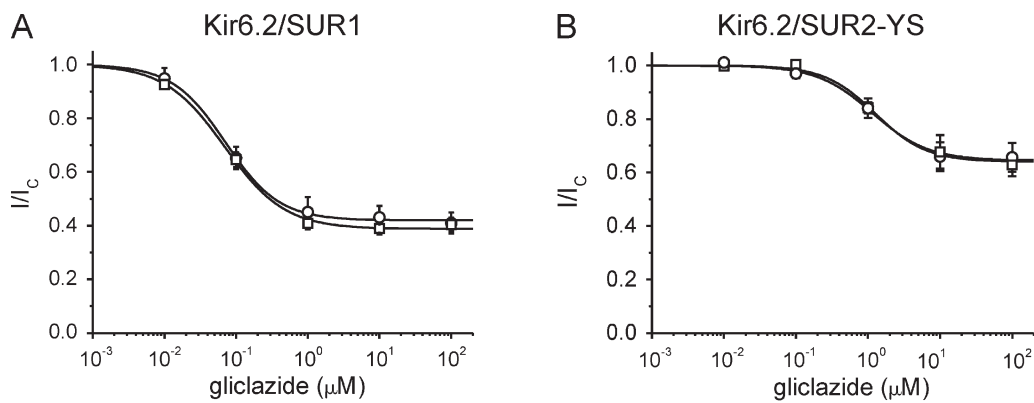

**Figure S3.** Concentration-response relationships for gliclazide inhibition of SUR1 and SUR2A-YS channels compared with either Kir6.2 or Kir6.2-G334D as the pore-forming subunit. (A and B) Concentration-response relationships for gliclazide inhibition of SUR1-containing (A;  $n = 6$ ) and SUR2A-YS-containing (B;  $n = 5$ ) channels. The pore-forming subunit was Kir6.2 (open circles) or Kir6.2-G334D (open squares). Current in the presence of gliclazide ( $I$ ) is expressed as a fraction of that in the absence of gliclazide ( $I_C$ ). The lines are the best fit of Eq. 1 to the mean data:  $IC_{50} = 72$  nM,  $h = 1.2$ ,  $a = 0.42$  (A, open circles);  $IC_{50} = 70$  nM,  $h = 1.0$ ,  $a = 0.39$  (A, open squares);  $IC_{50} = 1.3$   $\mu M$ ,  $h = 1.1$ ,  $a = 0.65$  (B, open circles);  $IC_{50} = 1.3$   $\mu M$ ,  $h = 1.2$ ,  $a = 0.64$  (B, open squares). Mean  $\pm$  SEM.

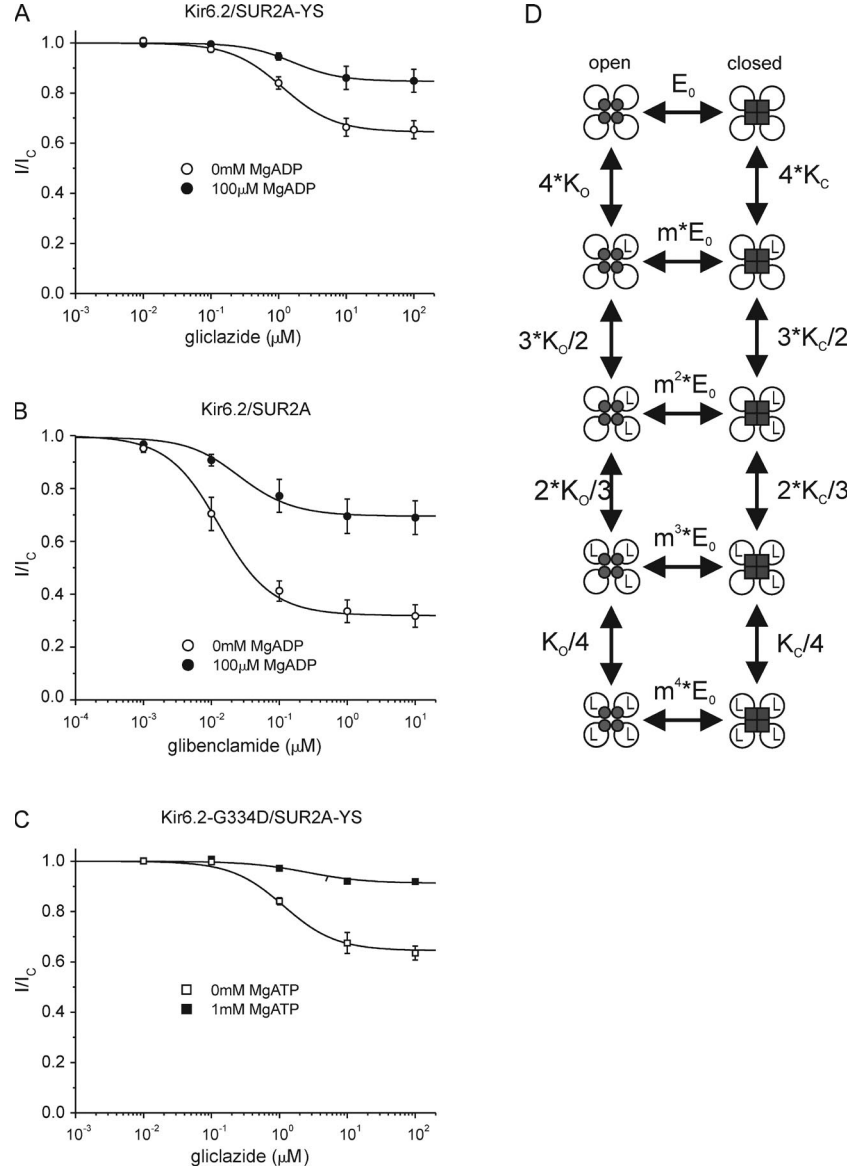

**Figure S4.** Simulation of concentration-inhibition relationships for sulfonylurea inhibition of SUR2A-containing channels using an MWC model. (A–D) Simulations of the concentration-response relationships for gliclazide inhibition of Kir6.2/SUR2A-YS (A) and Kir6.2-G334D/SUR2A-YS (C) channels and for glibenclamide inhibition of Kir6.2/SUR2A (B) channels in the absence and presence of 100  $\mu\text{M}$  MgADP (A and B) and 1 mM MgATP (C) using a MWC model (D). The data are taken from Fig. 3 (B and D) (A and B, open circles), Fig. 5 B (A, closed circles), Fig. 5 D (B, closed circles), and Fig. 5 F (C, closed squares). The lines are the best fit to the mean data of Eq. S1:

$$\frac{I}{I_0} = \frac{(1 + K_O * [S])^4}{(1 + F) * (1 + K_O * [S])^4 + E * (1 + K_O * m * [S])^4}, \quad (\text{S1})$$

$$\frac{1}{1 + F + E}$$

where  $I$  and  $I_0$  are the current in the presence and absence of the drug, respectively;  $[S]$  is the sulfonylurea concentration,  $E$  and  $F$  ( $F = 0.16$ ) are the equilibrium constants for slow and fast gating in the drug-free solution (Proks et al., 2013), and  $K_O$  and  $K_C = m * K_O$  are equilibrium binding constants for gliclazide to intraburst and interburst closed states, respectively. In the absence of nucleotides, the data are fitted with the MWC model assuming  $P_O = 0.71$  (a value obtained experimentally for both Kir6.2/SUR2A-YS and Kir6.2/SUR2A channels:  $P_O = 0.71 \pm 0.04$  [ $n = 5$ ] and  $P_O = 0.71 \pm 0.04$  [ $n = 6$ ], respectively). This yields values of  $K_O = 0.95/\mu\text{M}$  and  $K_C = 1.4/\mu\text{M}$  for gliclazide and  $K_O = 64/\mu\text{M}$  and  $K_C = 124/\mu\text{M}$  for glibenclamide. The data in 100  $\mu\text{M}$  MgADP (A) is best fitted with a  $P_O$  of 0.79 (mean experimental value of  $P_O = 0.79 \pm 0.02$ ;  $n = 5$ ); the data in 1 mM MgATP (C) is best fitted with a  $P_O$  of 0.81 (mean experimental value of  $P_O = 0.82 \pm 0.02$ ;  $n = 5$ ), and the data in 100  $\mu\text{M}$  MgADP (B) is best fitted with a  $P_O$  of 0.81 (mean experimental value of  $P_O = 0.80 \pm 0.01$ ;  $n = 5$ ). (D) MWC model for gating of  $K_{\text{ATP}}$  channels by ligands that bind to the sulfonylurea receptor.  $L$ , ligand (nucleotides or sulfonylureas);  $K_O$  and  $K_C$ , ligand-binding constants for the open and closed states, respectively;  $m$ , proportionality factor reflecting the change in the equilibrium gating constant  $E$  when the ligand is bound to the SUR ( $m = K_C/K_O$ ). Mean  $\pm$  SEM.

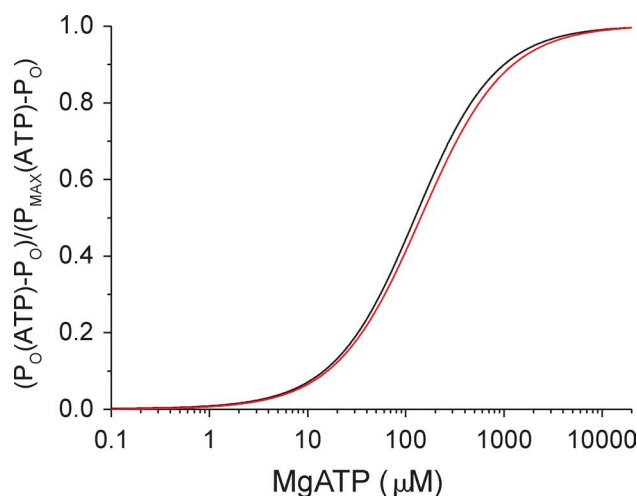

**Figure S5.** Effect of MgATP on the open probability of Kir6.2-G334D/SUR1 in the absence (black line) and presence of 30  $\mu\text{M}$  glyclazide (red line), simulated using the MWC model (Fig. S4 D). The lines are drawn to Eq. S2:

$$\frac{P_o(ATP) - P_o}{P_{MAX}(ATP) - P_o} = \frac{(1 + K_o * [ATP])^4}{(1 + F) * (1 + K_o * [ATP])^4 + E * (1 + K_o * m * [ATP])^4} \cdot \frac{1}{1 + F + E} \quad (\text{S2})$$

$$\frac{1}{1 + F + E * m^4} \cdot \frac{1}{1 + F + E}$$

where  $[ATP]$  is the ATP concentration,  $P_o(ATP)$  is the open probability in the presence of ATP,  $P_{MAX}(ATP)$  is the maximal open probability in the presence of ATP,  $K_o$  is the equilibrium binding constant for ATP to the open state, and  $F$  is the equilibrium gating constant for the fast gate (0.16; Proks et al., 2013). The factor  $m$  is given by  $m = K_c/K_o$ , where  $K_c$  is the equilibrium binding constant for ATP to the closed state and  $E$  is the equilibrium gating constant for the slow gate in the absence of the nucleotide (Proks et al., 2013). The value of  $K_o$  (0.00736/ $\mu\text{M}$ ) was obtained from the fit to the experimental data using experimentally measured mean values of  $P_o = 0.4$  and  $P_{MAX}(ATP) = 0.71$ . A transduction defect (such as that caused by glyclazide) will be represented in the MWC model by an increase in the factor  $m$ , which is given by  $m = K_c/K_o$ . When the experimental data were fit with the MWC model, the value of  $m$  increased from 0.66 in the absence of glyclazide to 0.90 in its presence (which is caused by the  $\sim 70\%$  decrease in the maximal extent of channel activation; Fig. 7 D). For display purposes, the maximum increase in  $P_o$  in the presence of MgATP and glyclazide has been scaled to that in the presence of MgATP alone. The decrease in the efficacy of transduction (from nucleotide binding to channel opening) reduces the slope of the concentration-activation relationship only slightly. This in turn has only a mild effect on the value of the  $EC_{50}$  (the simulated  $EC_{50}$  increased from 120 to 140  $\mu\text{M}$  in the absence and presence of the drug, respectively).

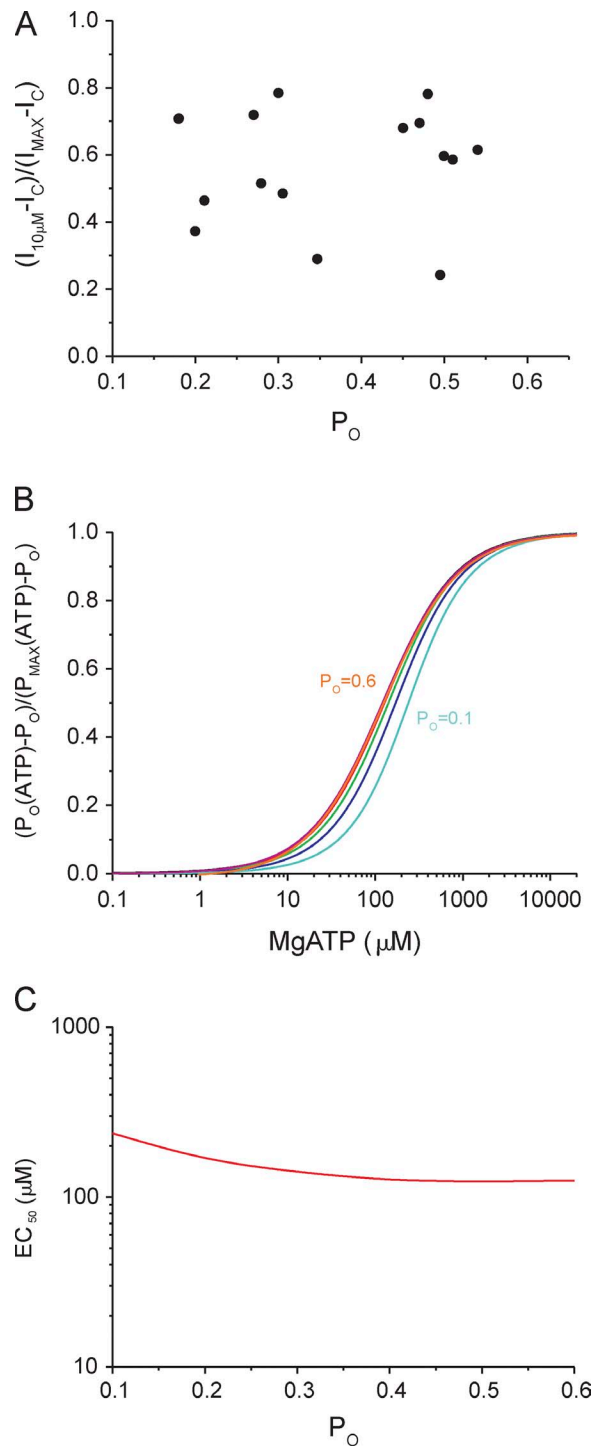

**Figure S6.** Effect of  $P_O$  on the  $EC_{50}$  for Mg-nucleotide activation of Kir6.2-G334D/SUR1 channels. (A) Relationship between the intrinsic  $P_O$  (i.e., that measured in nucleotide-free solution) and the fractional increase in Kir6.2-G334D/SUR1 current in the presence of 10  $\mu\text{M}$  MgADP (i.e., a concentration which approximates the  $EC_{50}$  for MgADP activation).  $P_O$  was determined by noise analysis as described previously (Proks et al., 2010). Current is expressed as a fraction of the maximal current increase produced by MgADP (which occurs at 1 mM MgADP); i.e.,  $(I_{10\mu\text{M}} - I_C) / (I_{\text{MAX}} - I_C)$ , where  $I_{10\mu\text{M}}$  is the steady-state  $K_{\text{ATP}}$  current in the presence of 10  $\mu\text{M}$  MgADP,  $I_C$  is the current in nucleotide-free solution obtained by averaging the current before and after nucleotide application, and  $I_{\text{MAX}}$  is the steady-state  $K_{\text{ATP}}$  current in the presence of 1 mM MgADP. (B) Concentration-activation relationships for MgATP, simulated with an MWC model (Fig. S4 D) for different values of intrinsic  $P_O$  (0.1, 0.2, 0.3, 0.4, 0.5, and 0.6). The lines are drawn to Eq. S2 (see Fig. S5). Values of  $E$  and  $m$  were calculated for different values of intrinsic  $P_O$ . (C) Values of  $EC_{50}$  for activation of Kir6.2-G334D/SUR1 channels by MgATP as a function of  $P_O$  (calculated using the MWC model used in B).

TABLE S1

Mean  $\pm$  SEM values of  $P_O$  measured in nucleotide-free solution in the presence and absence of 2 mM  $Mg^{2+}$

| Channel          | 0 mM $Mg^{2+}$  | 2 mM $Mg^{2+}$  |
|------------------|-----------------|-----------------|
| Kir6.2/SUR1      | 0.45 $\pm$ 0.03 | 0.43 $\pm$ 0.03 |
| Kir6.2/SUR1-K1A  | 0.43 $\pm$ 0.03 | 0.43 $\pm$ 0.03 |
| Kir6.2/SUR1-K2A  | 0.45 $\pm$ 0.05 | 0.46 $\pm$ 0.04 |
| Kir6.2/SUR1-KAKA | 0.48 $\pm$ 0.05 | 0.45 $\pm$ 0.07 |

$P_O$  was determined by noise analysis, as described previously (Proks et al., 2010), after the fast rundown of channel activity (1 min after patch excision).  $n = 11$  in all cases.

## REFERENCES

- Babenko, A.P. 2008. A novel ABCC8 (SUR1)-dependent mechanism of metabolism-excitation uncoupling. *J. Biol. Chem.* 283:8778–8782. <http://dx.doi.org/10.1074/jbc.C700243200>
- Colquhoun, D. 1998. Binding, gating, affinity and efficacy: the interpretation of structure-activity relationships for agonists and of the effects of mutating receptors. *Br. J. Pharmacol.* 125:923–947. <http://dx.doi.org/10.1038/sj.bjp.0702164>
- Craig, T.J., F.M. Ashcroft, and P. Proks. 2008. How ATP inhibits the open  $K_{ATP}$  channel. *J. Gen. Physiol.* 132:131–144. <http://dx.doi.org/10.1085/jgp.200709874>
- Drain, P., X. Geng, and L. Li. 2004. Concerted gating mechanism underlying  $K_{ATP}$  channel inhibition by ATP. *Biophys. J.* 86:2101–2112. [http://dx.doi.org/10.1016/S0006-3495\(04\)74269-1](http://dx.doi.org/10.1016/S0006-3495(04)74269-1)
- Proks, P., H. de Wet, and F.M. Ashcroft. 2010. Activation of the  $K_{ATP}$  channel by Mg-nucleotide interaction with SUR1. *J. Gen. Physiol.* 136:389–405. <http://dx.doi.org/10.1085/jgp.201010475>
- Proks, P., H. de Wet, and F.M. Ashcroft. 2013. Molecular mechanism of sulphonylurea block of  $K_{ATP}$  channels carrying mutations that impair ATP inhibition and cause neonatal diabetes. *Diabetes.* 62:3909–3919. <http://dx.doi.org/10.2337/db13-0531>
- Reimann, F., F.M. Gribble, and F.M. Ashcroft. 2000. Differential response of  $K(ATP)$  channels containing SUR2A or SUR2B subunits to nucleotides and pinacidil. *Mol. Pharmacol.* 58:1318–1325.
- Tamarro, P., P. Proks, and F.M. Ashcroft. 2006. Functional effects of naturally occurring KCNJ11 mutations causing neonatal diabetes on cloned cardiac  $K_{ATP}$  channels. *J. Physiol.* 571:3–14. <http://dx.doi.org/10.1113/jphysiol.2005.099168>
